# Supplementary material
Source: HighWire-hosted journal article supplement (http://www.cmaj.ca/highwire/filestream/58460/field_highwire_adjunct_files/0/garcia.pdf)
Supplement: garcia.pdf [file garcia.pdf]

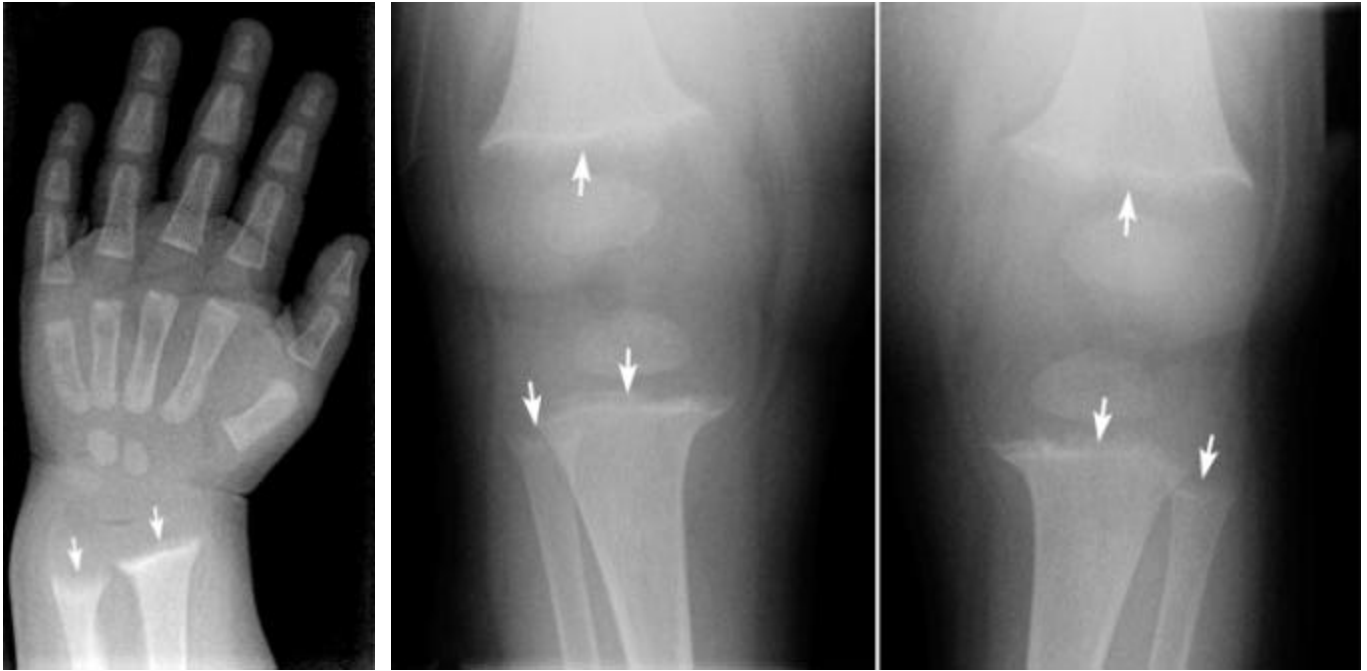

Radiographs of a 13-month-old boy of African descent, revealing widening, fraying, cupping and irregularity of the metaphyseal border of his distal radius and ulna, with osteomalacia of his long bones.

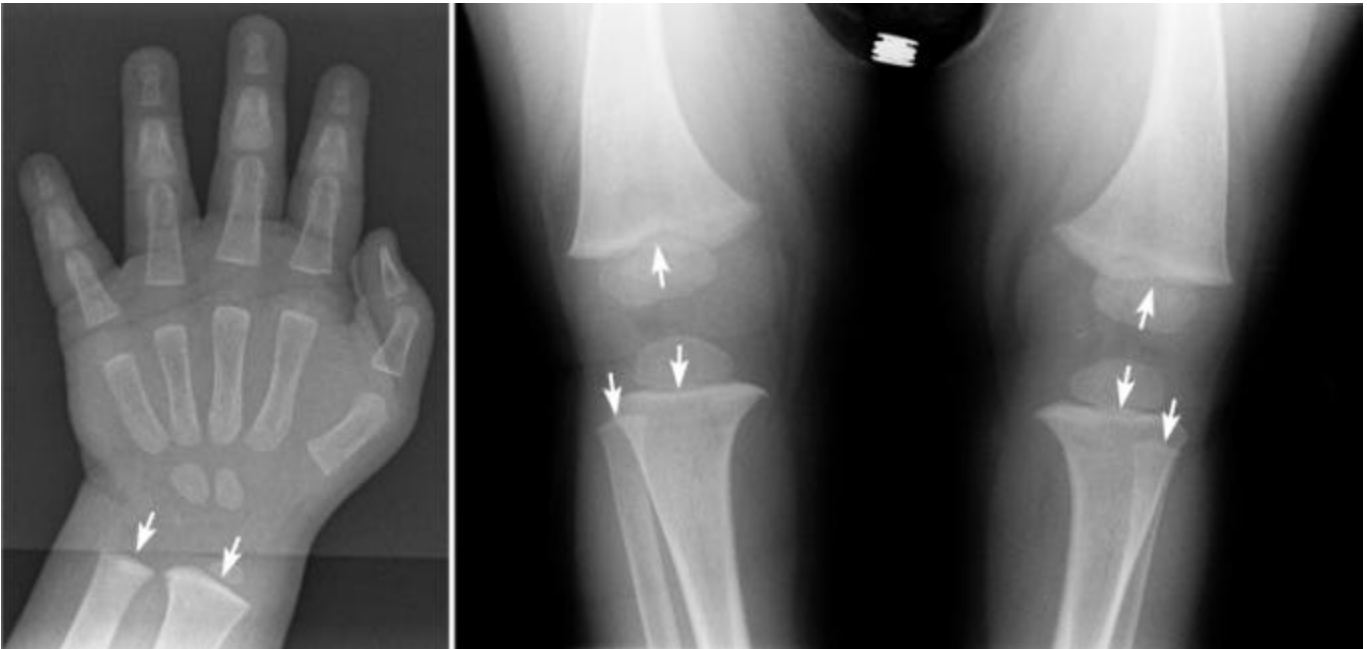

After 3 months of oral dietary supplementation with high-dose vitamin D<sub>3</sub> and calcium gluconate, the metaphyseal abnormalities appear to have resolved.
